# Supplementary material for: Radiofrequency Irradiation Modulates TRPV1-Related Burning Sensation in Rosacea
Source: PubMed Central journal article supplement (PMC7961329; doi:10.3390/molecules26051424), 2021-03-06
Supplement: molecules-26-01424-s001.pdf [file molecules-26-01424-s001.pdf]

Article

# Radiofrequency Irradiation Modulates TRPV1-Related Burning Sensation in Rosacea

Seyeon Oh <sup>1,†</sup>, Myeongjoo Son <sup>1,2,†</sup>, Joonhong Park <sup>3</sup>, Donghwan Kang <sup>4</sup> and Kyunghee Byun <sup>1,2,\*</sup>

<sup>1</sup> Functional Cellular Networks Laboratory, Lee Gil Ya Cancer and Diabetes Institute, Gachon University College of Medicine, Incheon, Republic of Korea; seyeon8965@gmail.com (S.O.); mjson@gachon.ac.kr (M.S.)

<sup>2</sup> Department of Anatomy & Cell Biology, Gachon University College of Medicine, Incheon, Republic of Korea

<sup>3</sup> Maymorning Dermatologic Clinic, Sungnam, Republic of Korea; 5maymorning@gmail.com

<sup>4</sup> Jeisys Medical Inc., Seoul, Republic of Korea; kang@jeisys.com

\* Correspondence: khbyun1@gachon.ac.kr; Tel.: +82-32-899-6511

† These authors contributed equally to this work.

## *Capsaicin treatment model*

The F11 cells were treated capsaicin 10 $\mu$ M for 10 minutes [S1] before RF irradiation (2 MHz; 10 Watts; 50, 100, or 150 ms) and culture for 24 hours. After 24 hours, the F11 cells were harvested.

## Supplementary figure

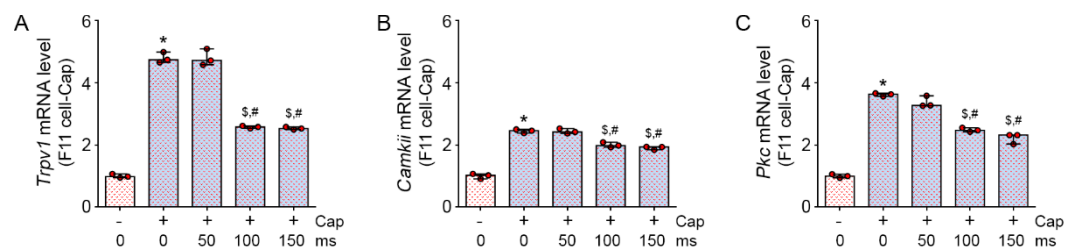

**Figure S1. Inhibitory effects of RF on TRPV1 and PKC-dependent pathway in capsaicin-treated sensory neuronal cells.** (A-C) Expression of the TRPV1 related PKC-dependent pathway molecule, *Camkii* and *Pkc* mRNA were confirmed by qRT-PCR in capsaicin treated F11 cell model and were normalized to that of *Actb* and expressed relative to the control group. \*,  $p < 0.05$  vs. Control; \$,  $P < 0.05$  vs. Capsaicin; #,  $P < 0.05$  vs. RF 50ms. Cap, Capsaicin.

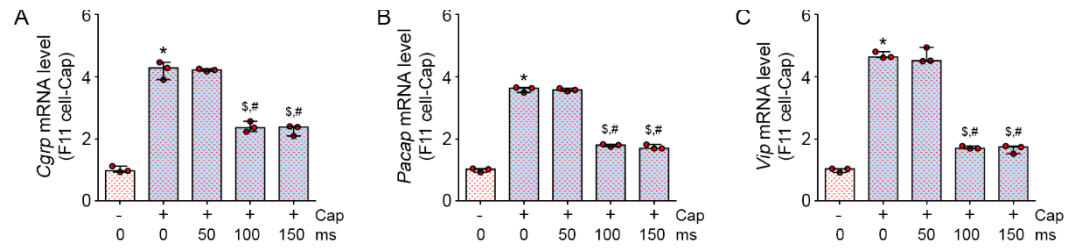

**Figure S2. Inhibitory effects of RF on TRPV1-induced neuropeptide expression in capsaicin-treated sensory neuronal cells.** (A–C) TRPV1-induced neuropeptide (*Cgrp*, *Pacap* and *Vip*) mRNA expression level was analyzed by qRT-PCR in capsaicin treated F11 cell model and were normalized to that of *Actb* and expressed relative to the control group. \*,  $p < 0.05$  vs. Control; \$,  $P < 0.05$  vs. Capsaicin; #,  $P < 0.05$  vs. RF 50ms. Cap, Capsaicin.

## Supplementary reference

- S1 Erine F.; Scott K-G.; Trevor K.; Jeff M.; Aaron D. TRPV1 Agonist, Capsaicin, Induces Axon Outgrowth after Injury via Ca<sup>2+</sup>/PKA Signaling. *eNeuro* **2018**, 5, ENEURO.0095-18.
